# Supplementary material for: Hypoxia Regulates Endogenous Double-Stranded RNA Production via Reduced Mitochondrial DNA Transcription
Source: PubMed Central journal article supplement (PMC8651540; doi:10.3389/fonc.2021.779739), 2021-11-24
Supplement: DataSheet_1.pdf [file DataSheet_1.pdf]

## Supplementary Figure 1

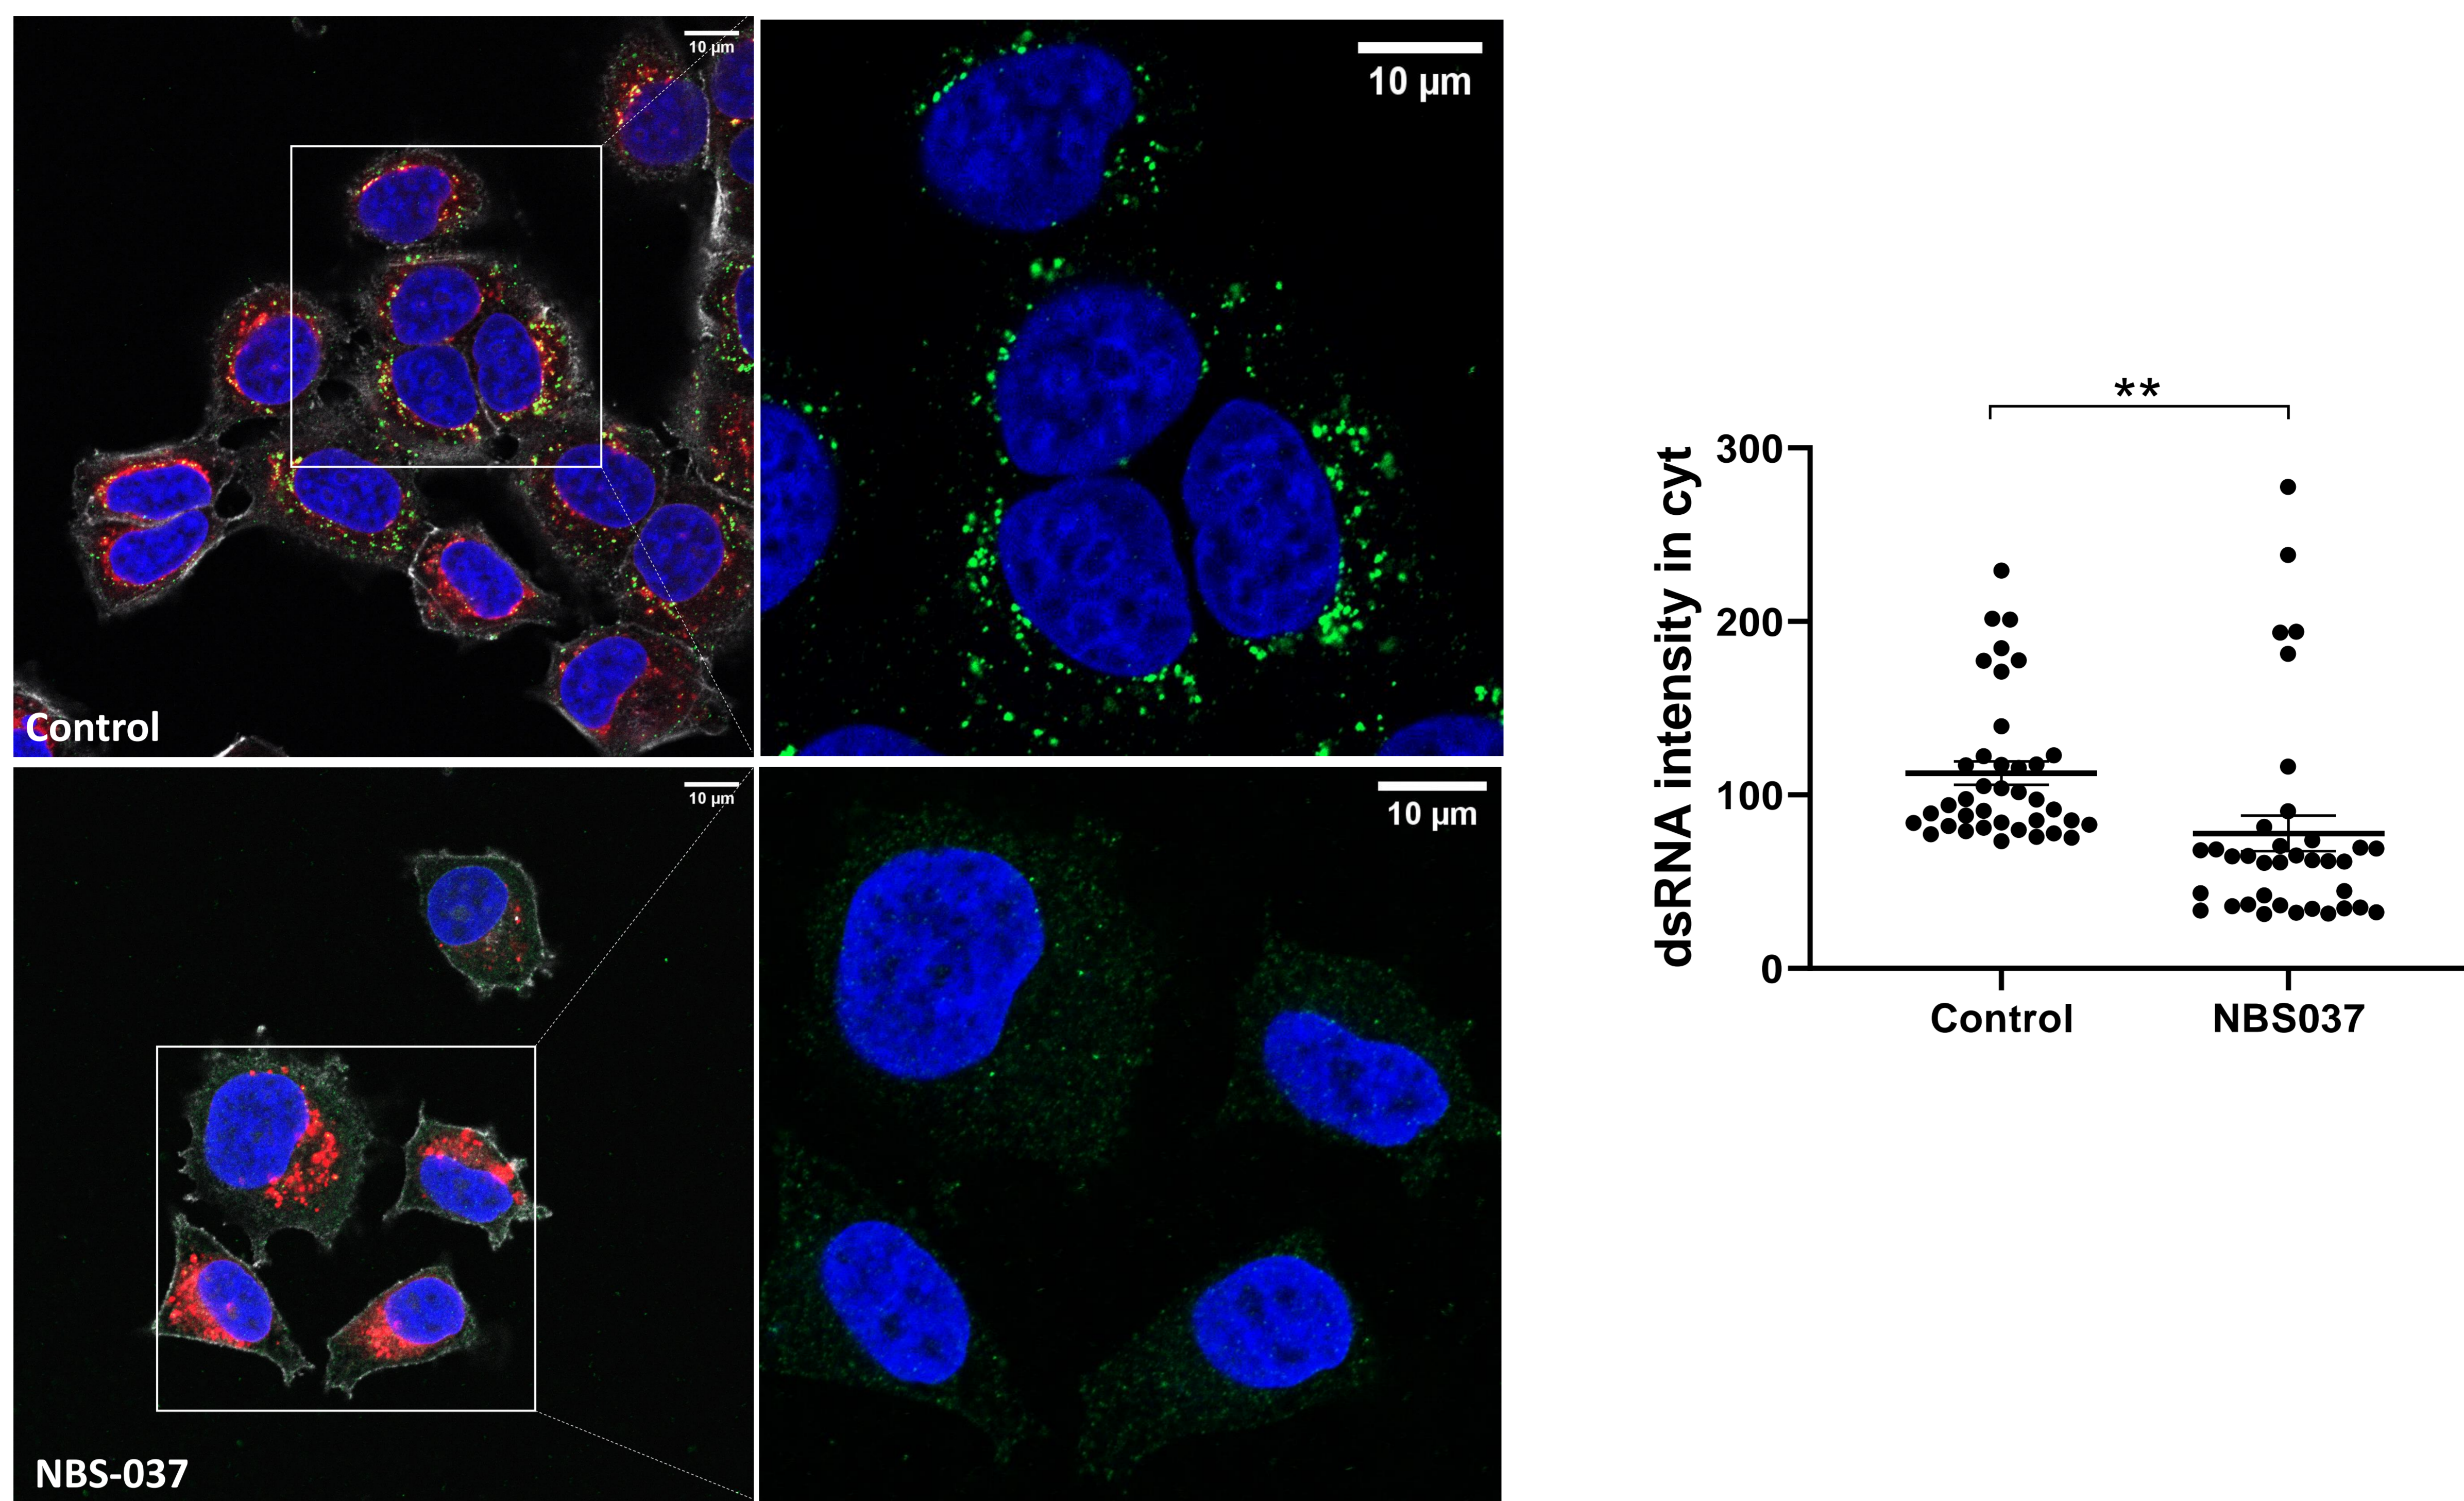

**Supplementary Figure 1. NBS-037 treatment reduced dsRNA levels in MCF7 cells.** dsRNA was stained using J2 antibody in MCF7 cells cultured in normoxia and treated with a control vehicle (DMSO) (n=38 cells) or 1 $\mu$ M NBS-037 (n=36 cells) for 48h from 3 independent replicates. Data is shown as mean $\pm$ SEM. \* p<0.05, \*\* p<0.01, \*\*\* p<0.001. Green: J2 antibody staining, blue: DAPI, and red: MitoTracker staining. Scale bars correspond to 10 $\mu$ m.



A

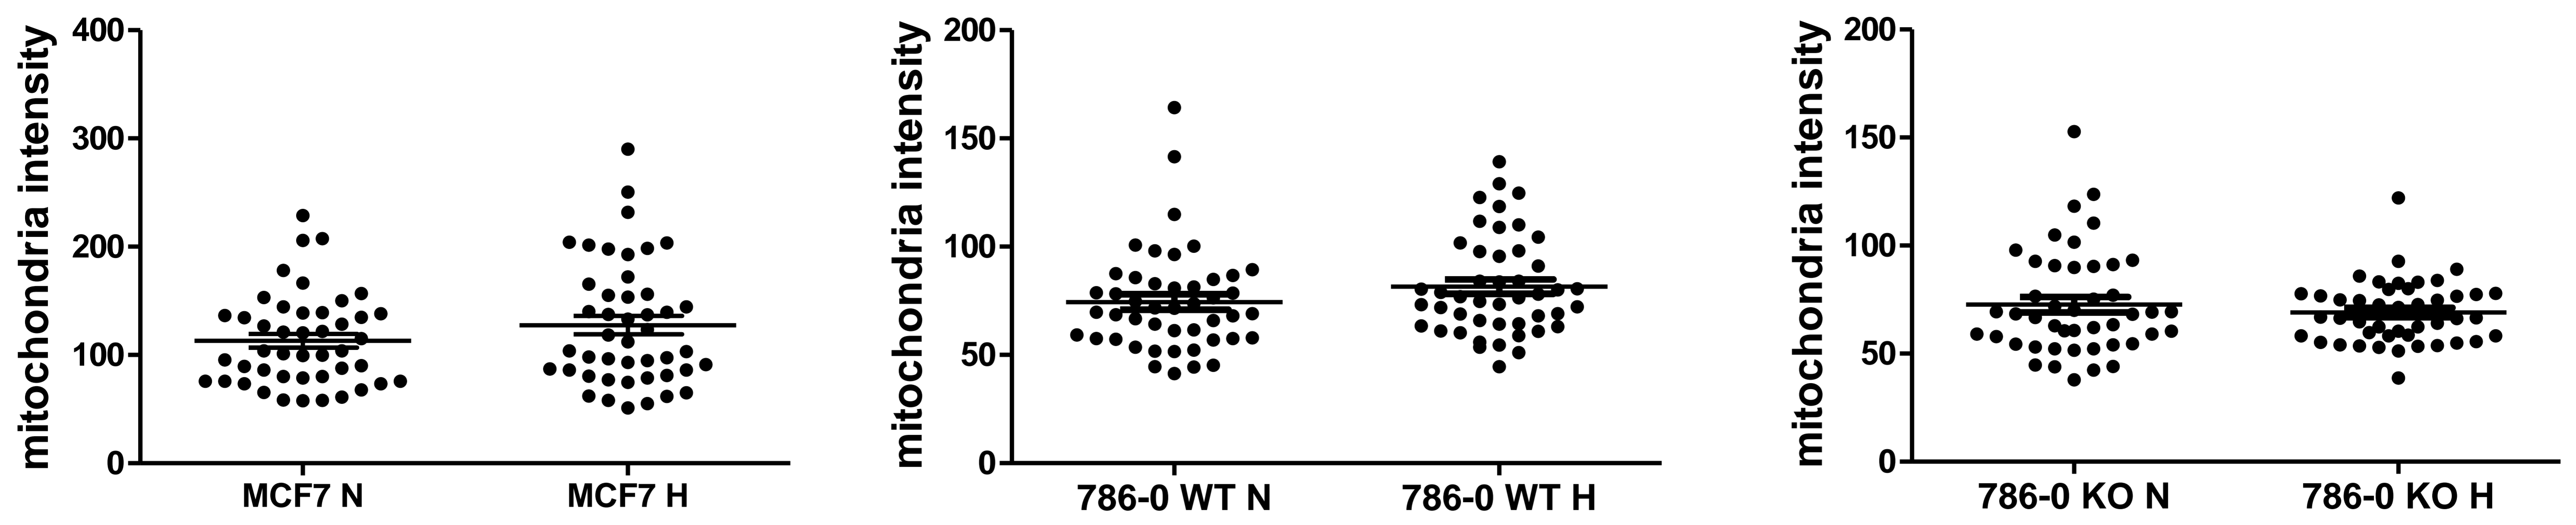

B

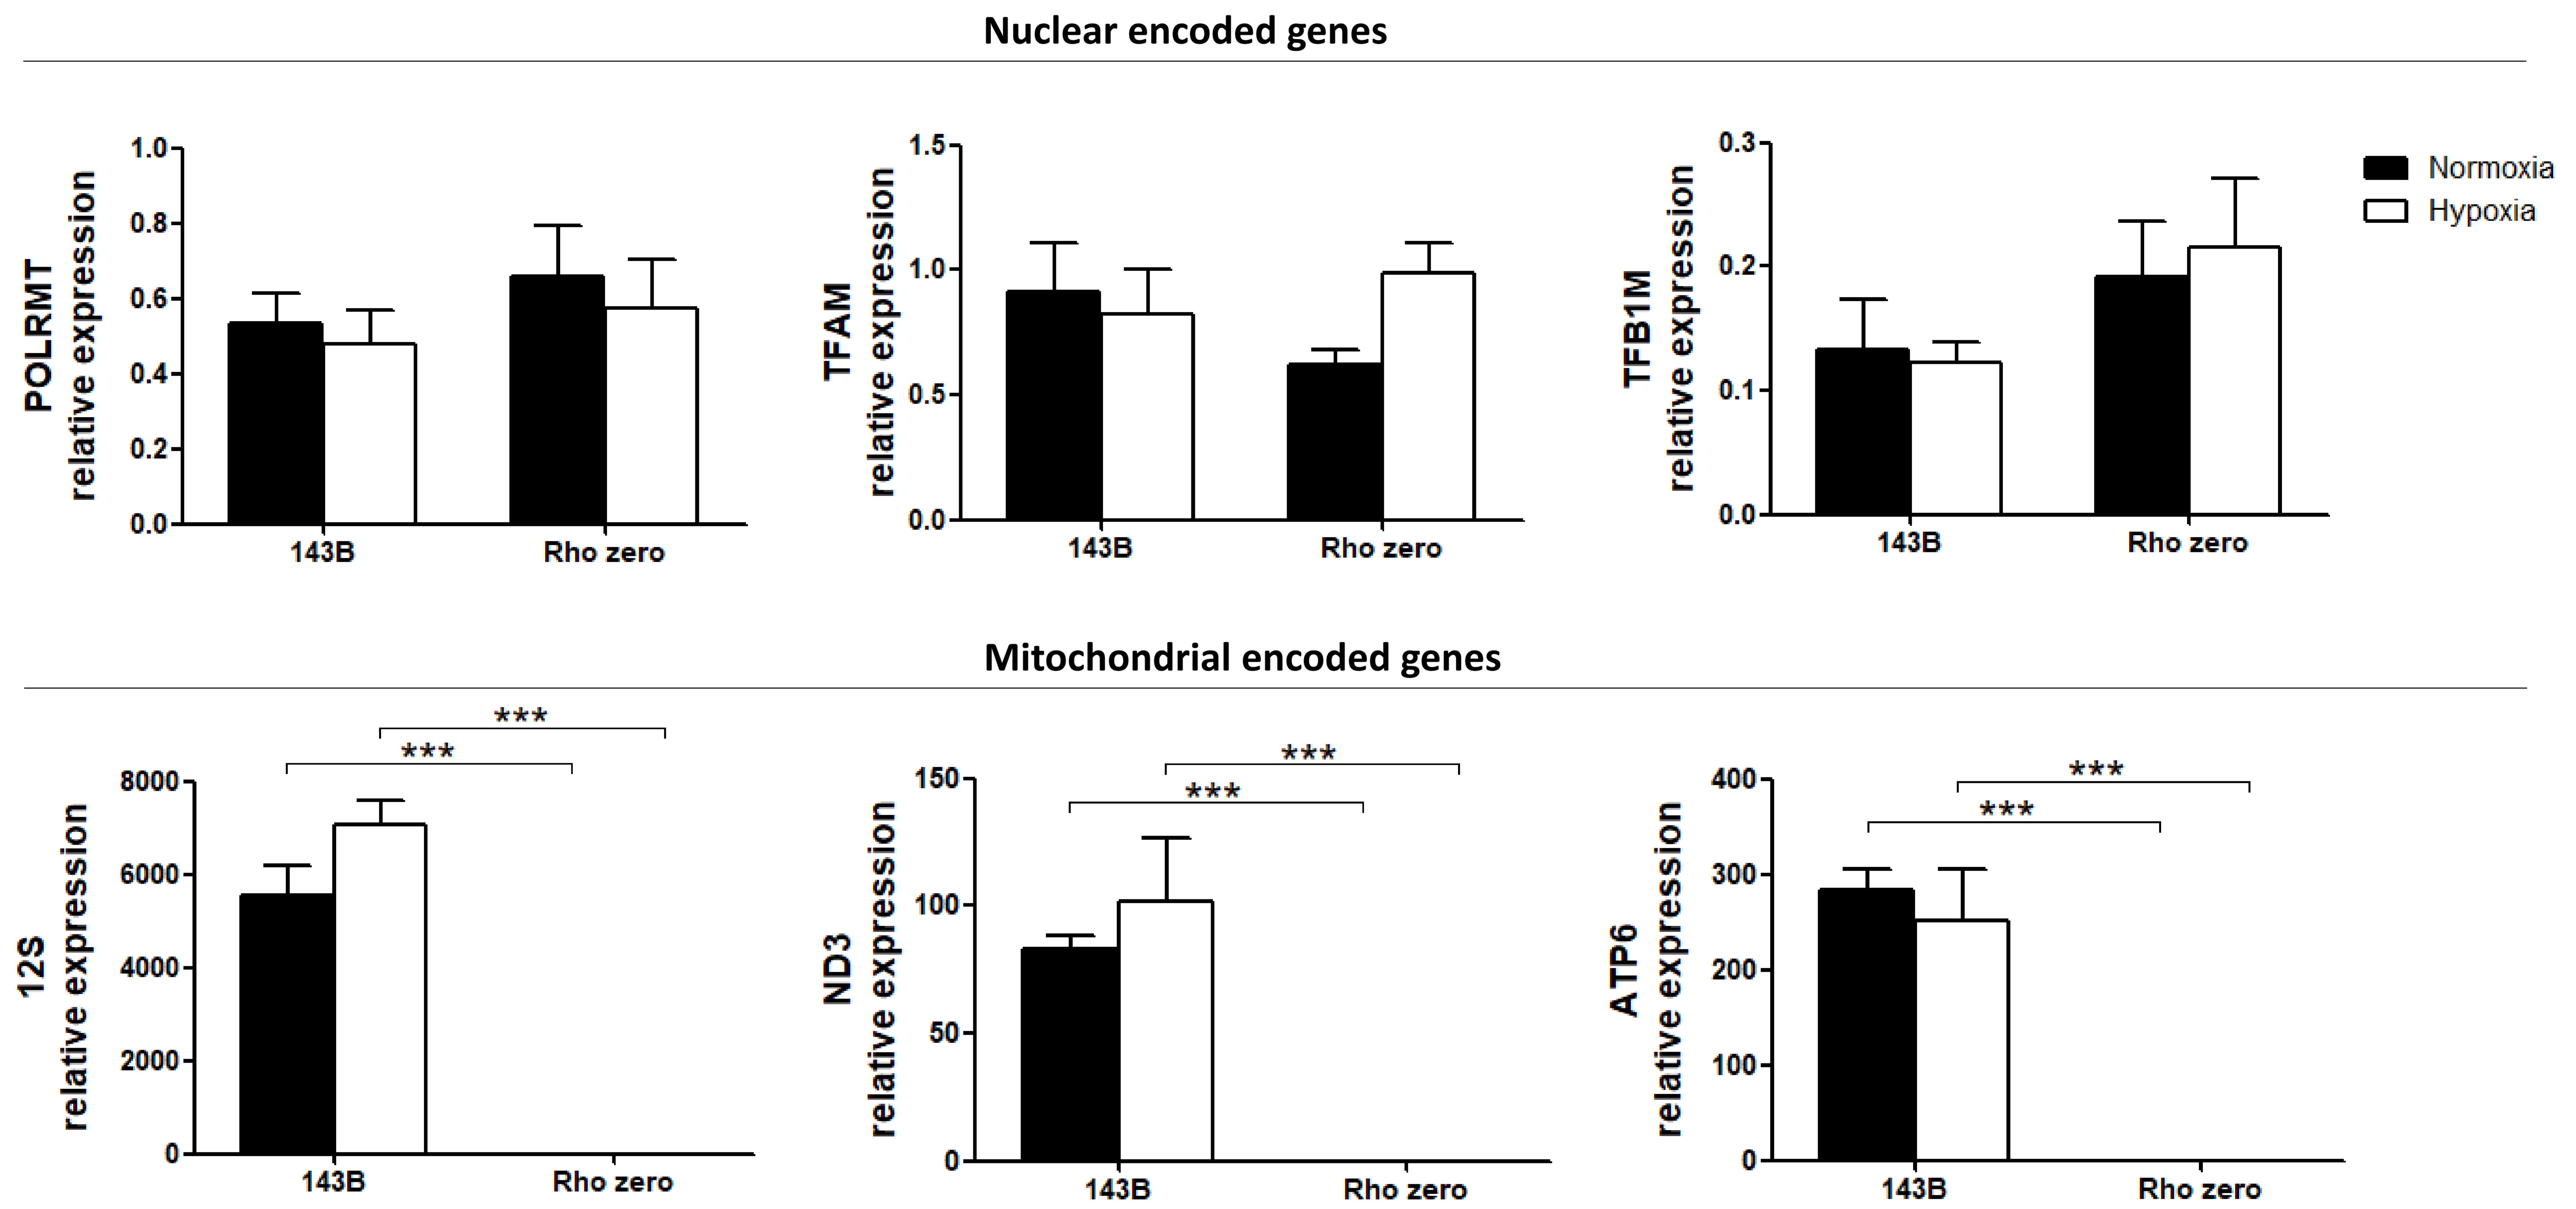

**Supplementary Figure 2. Hypoxia does not affect mitochondrial content in MCF7 or 786-0 cells and expression of mitochondrial genes in 143B parental cells.** (A) Mitochondria staining with MitoTracker was quantified in MCF7, 786-0 WT and 786-0 KO cells cultured in normoxia or 0.1% hypoxia for 48h (n=3). (B) RNA expression of mitochondrial encoded genes (*12S*, *ND3*, *ATP6*) or nuclear encoded genes (*POLRMT*, *TFAM*, *TFB1M*) involved in mitochondrial function was evaluated by qPCR in 143B parental and Rho Zero cells cultured in normoxia or 0.1% hypoxia (n=3). Number of replicates indicate biological replicates and data is shown as mean±SEM. \* p<0.05, \*\* p<0.01, \*\*\* p<0.001

### Supplementary Figure 3

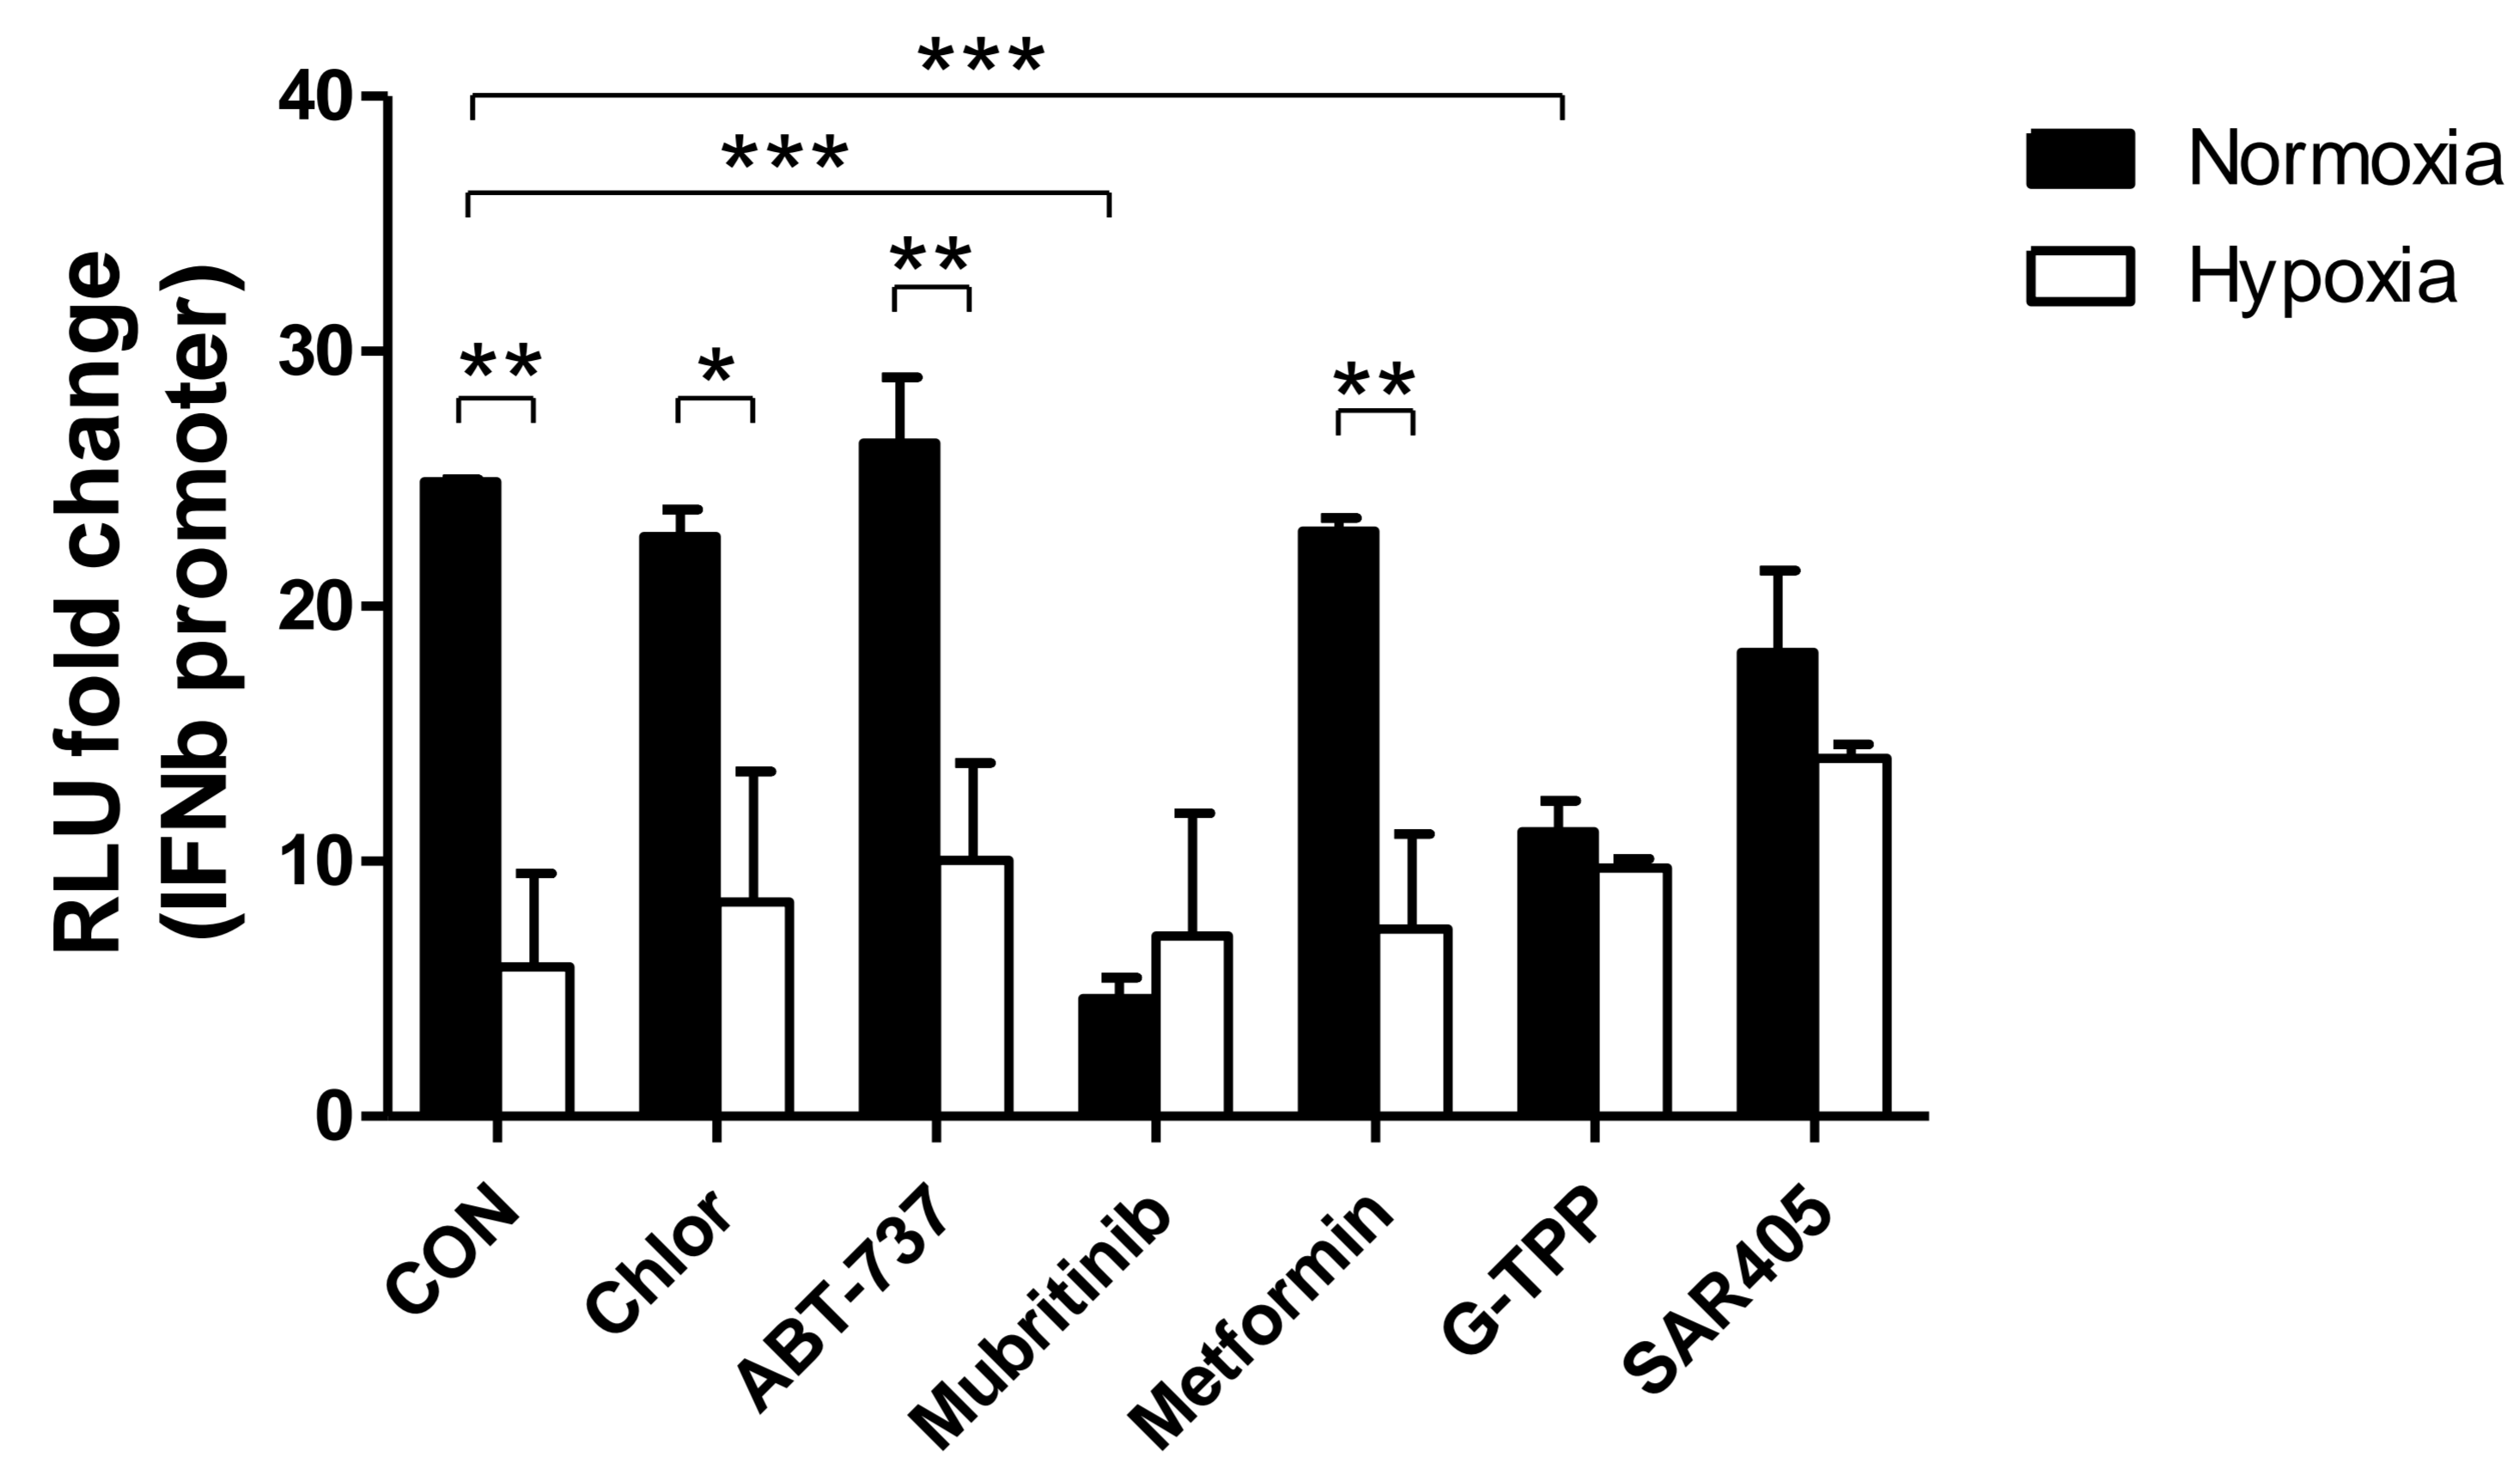

**Supplementary Figure 3. Hypoxia has a major role over the effect of different mitochondrial-targeting drugs on *IFNβ* promoter activation.** *IFNβ* promoter stimulation was evaluated in MCF7 cells cultured in normoxia or 0.1% hypoxia for 48h and treated with different drugs targeting different mitochondrial processes (n=3). Number of replicates indicate biological replicates and data is shown as mean±SEM. \* p<0.05, \*\* p<0.01, \*\*\* p<0.001
