# Supplementary material for: Hypoxia Regulates Endogenous Double-Stranded RNA Production via Reduced Mitochondrial DNA Transcription
Source: PubMed Central journal article supplement (PMC8651540; doi:10.3389/fonc.2021.779739), 2021-11-24
Supplement: DataSheet_2.pdf [file DataSheet_2.pdf]

**Supplementary table 1. siRNA sequences.**

| siRNA   | Sequence (5'-3')       |
|---------|------------------------|
| siCON   | ACGACACGCAGGUCGUCAUTT* |
| siBNIP3 | UCGCAGACACCACAAGUA     |
|         | GAACUGCACUUCAGCAAUA    |
|         | GGAAAGAAGUUGAAAGCAU    |
|         | ACACGAGCGUCAUGAAGAA    |

**Supplementary table 2. Antibodies.**

| Protein            | Antibody  | Company                   | Dilution          |
|--------------------|-----------|---------------------------|-------------------|
| $\beta$ -actin     | A3854     | Sigma                     | 1:50000 WB        |
| HIF1a              | 610958    | BD Transduction Lab       | 1:1000 WB         |
| HIF2a              | NB100-122 | Novus Biologicals         | 1:500 WB          |
| SUV3               | A303-055A | Bethyl Laboratories       | 1:1000 WB         |
| PNPT1              | Ab96176   | Abcam                     | 1:1000 WB         |
| J2                 | 10010500  | Scions                    | 1:200 IF          |
| PKR                | sc-6282   | Insight Biotechnology Ltd | 1:50 IF, 1:500 WB |
| phospho PKR (T446) | ab32036   | Abcam                     | 1:1000 WB         |

**Supplementary table 3. Primers.**

| Primers  | Sequence (5'-3')        |
|----------|-------------------------|
| HPRT1_F  | TGACACTGGCAAAACAATGCA   |
| HPRT1_R  | GGTCCTTTTCACCAGCAAGCT   |
| 12S_F    | ATATACCGCCATCTTCAGCA    |
| 12S_R    | CTAAATCCACCTTCGACCCT    |
| ATP6_F   | GGACTCCTGCCTCACTCATT    |
| ATP6_R   | AAGTGGGCTAGGGCATT TTT   |
| TFAM_F   | GCTAAGGGTGATTCACCGCA    |
| TFAM_R   | ATCCTTTCGTCCA ACTTCAATC |
| POLRMT_F | AGGTCAAGCAAATAGGAGGTG   |
| POLRMT_R | CAGCGAGTGGATGAAGTTGG    |
| CYTB_F   | CGCATGATGAACTTCGGCT     |
| CYTB_R   | ATTTGGAGGATCAGGCAGGC    |
| ND3_F    | GGCTTCGACCCTATATCCCC    |
| ND3_R    | TAGGGCTCATGGTAGGGGTA    |
| TFB1M_F  | TGCTTGCCGCGTATCATG      |
| TFB1M_R  | CGGAGGGAGACGGCAAGT      |
| MRPL1_F  | TTTACAGAGAATGCATCAGAGG  |
| MRPL1_R  | AGGCATTATTTCTGGAACAGC   |
| MRPL11_F | GAGGCGTTTCCATCAACCAG    |
| MRPL11_R | CACCTCTTTCCTGTTTGCC     |
| MRPL13_F | TACTAGGAGAAGGACGTACGG   |
| MRPL13_R | CACAGTCACTCAGTGCATGG    |
| MRPL21_F | GGAAATGAACTAGACCTTGCGT  |
| MRPL21_R | AAGATCCTTTCGGAGGAGTG    |
| MRPS34_F | GTGGACTACGAGACCTTGAC    |
| MRPS34_R | AAAGAGGCGTCTTTGAAGGTC   |
| MRPS23_F | GCTCCCATCCAAGACATCTG    |
| MRPS23_R | TACTTCTCCACAAACCGTTGAC  |

|             |                          |
|-------------|--------------------------|
| DDX58_F     | CAAGCCTTCCAGGATTATATCCG  |
| DDX58_R     | AGTCCAGAATAACCTGCATGGT   |
| ADAR-p150_F | CTTCCAGTGCGGAGTAGCG      |
| ADAR-p150_R | GTGACGGTGTCTGCTTTCCA     |
| Mx1_F       | GTTACCAGGACTACGAGATTGAG  |
| Mx1_R       | GATGAGTGTCTTGATCTTATACCC |
| IFIT1_F     | TACCTGGACAAGGTGGAGAA     |
| IFIT1_R     | GTGAGGACATGTTGGCTAGA     |
| IFIT2_F     | TGTGCAACCTACTGGCCTAT     |
| IFIT2_R     | TTGCCAGTCCAGAGGTGAAT     |
| ISG15_F     | GCGAACTCATCTTTGCCAGTA    |
| ISG15_R     | CCAGCATCTTCACCGTCAG      |
| PKR_F       | ATCTGACTACCTGTCCTCTG     |
| PKR_R       | GAGACCATTCATAAGCAACGA    |
